# Supplementary material for: Phylogenetic Properties of 50 Nuclear Loci in Medicago (Leguminosae) Generated Using Multiplexed Sequence Capture and Next-Generation Sequencing
Source: PubMed Central journal article supplement (PMC4201463; doi:10.1371/journal.pone.0109704), 2014-10-17

## Supplementary Material

**Table A: reads per sample before and after adapter removal and quality trim (phred score threshold of 20)**

| sample                         | total reads | reads kept after quality trimming | % reads kept |
|--------------------------------|-------------|-----------------------------------|--------------|
| <i>Medicago italica</i>        | 603490      | 529164                            | 88%          |
| <i>Medicago sativa</i>         | 852870      | 620087                            | 73%          |
| <i>Medicago medicaginoides</i> | 689712      | 606195                            | 88%          |
| <i>Melilotus neapolitanus</i>  | 1107464     | 909632                            | 82%          |
| <i>Melilotus sulcatus</i>      | 1622968     | 1192313                           | 73%          |

### Methods A

Sequences of four additional species of *Medicago* (*M. littoralis*, *M. papillosa*, *M. marina* and *M. prostrata*) were produced following the protocol presented in the Methods section.

Multiple individuals were sampled for *M. papillosa* and *M. prostrata*, in the latter case using mostly herbarium preserved specimens. Following sequence assembly, the program CLC-mapper (CLC Bio, Aarhus, Denmark) was used to map reads to the assembled sequence of genes 7 (Medtr2g038270.1), 9 (Medtr3g079830.1), 48 (Medtr3g113790.1) and 50 (Medtr3g113960.1). From the mapped reads, alleles were phased using the program Samtools phase (Li et al., 2009) and phased reads were re-assembled into contigs using CLC-assembler and aligned in Geneious Pro (v.5.3.6). Model testing was done using the reversible-jump

mcmc implemented in MrBayes v.3.1.2 (Huelsenbeck and Ronquist, 2005) and gene trees were reconstructed in BEAST v1.8.0. (Drummond and Rambaut, 2007).

### Supplementary figure legends:

Calibrated BEAST trees of genes 7 (Figure A), 9 (Figure B), 48 (Figure C) and 50 (Figure D) showing posterior probability values for each node.

### Supplementary figures:

Figure A

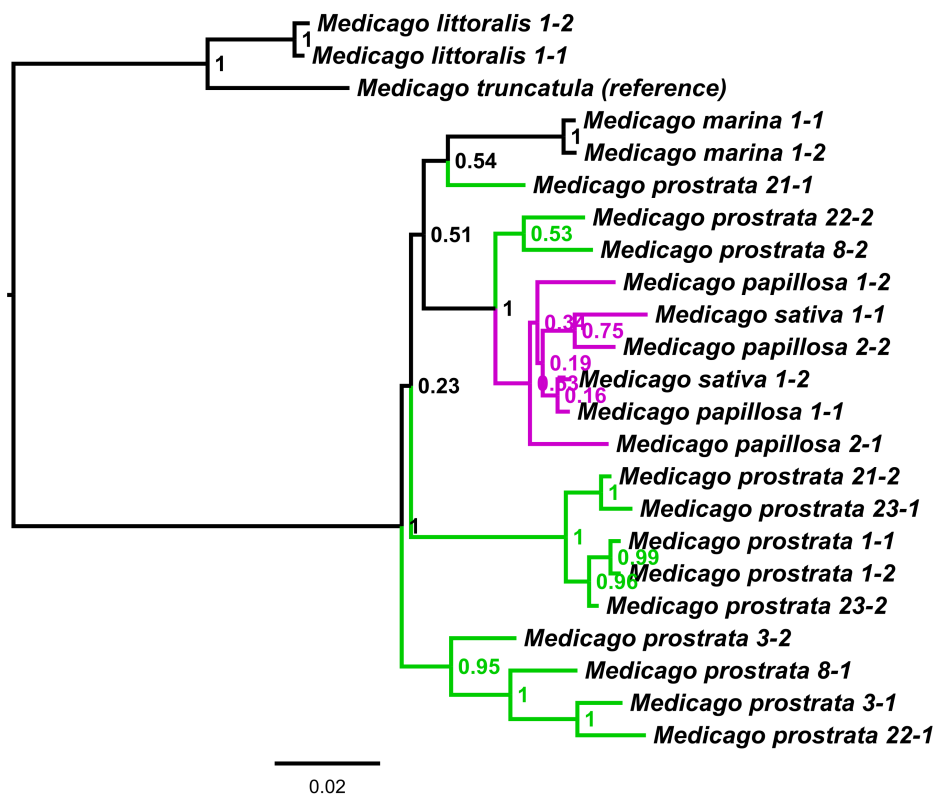

Figure B

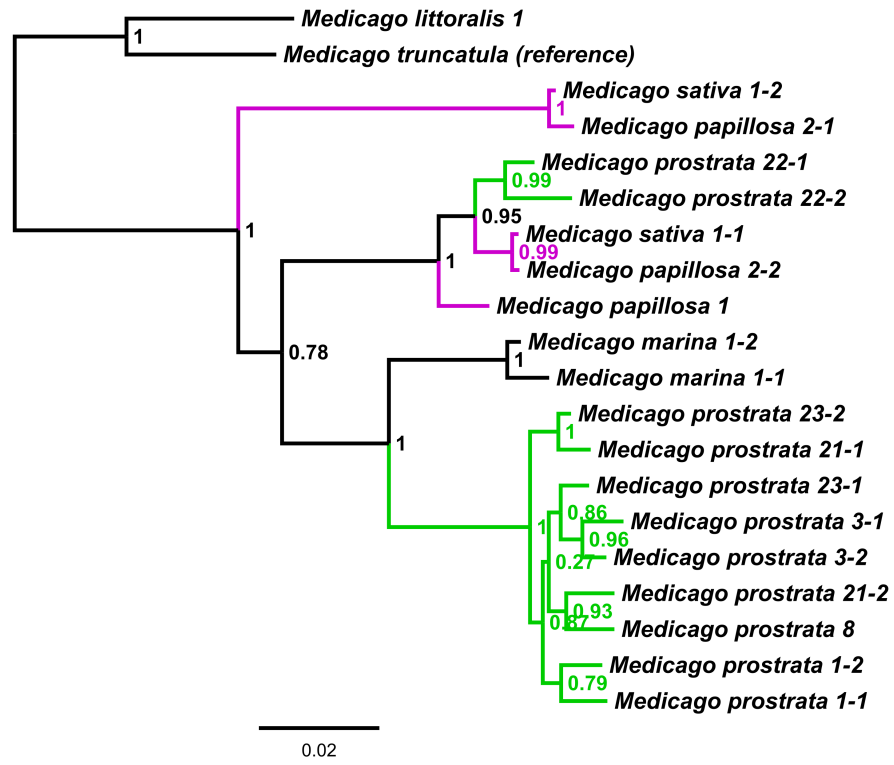

Figure C

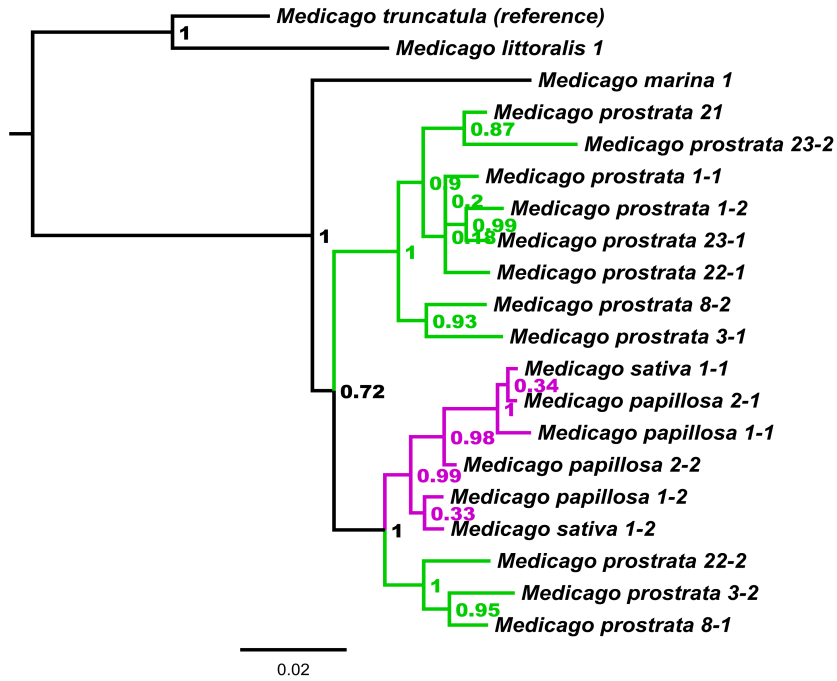

Figure D

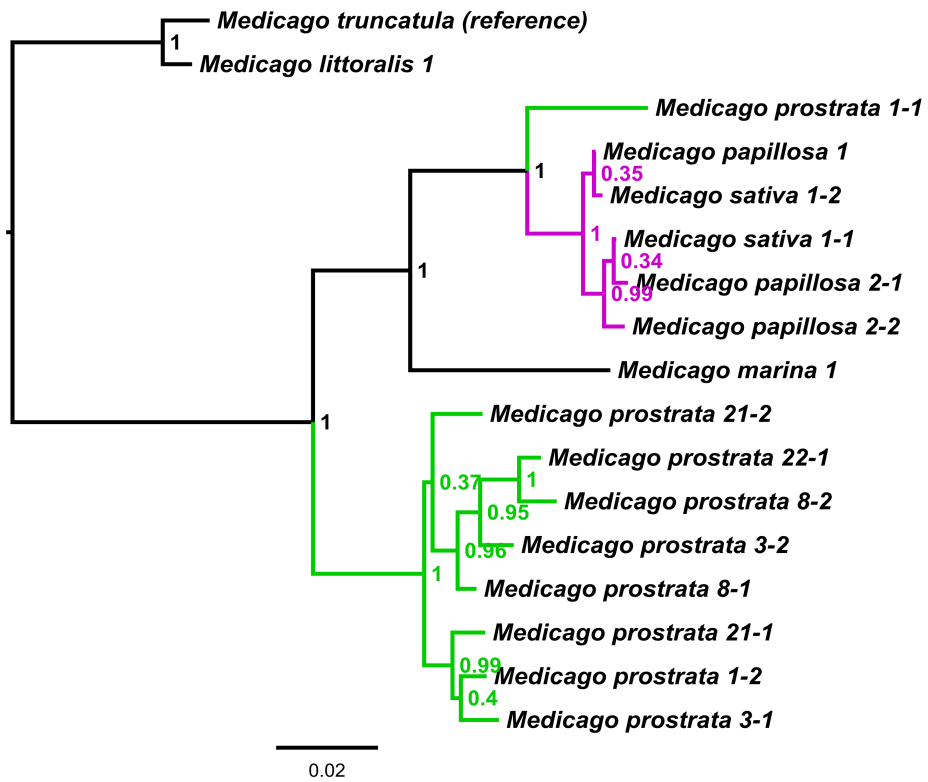

Supplement: pone.0109704.s002.pdf [file pone.0109704.s002.pdf]
